# Supplementary material
Source: PubMed Central journal article supplement (PMC7032955)
Supplement: EMS83031-supplement-Supplementary_Text_and_Figures.pdf [file EMS83031-supplement-Supplementary_Text_and_Figures.pdf]

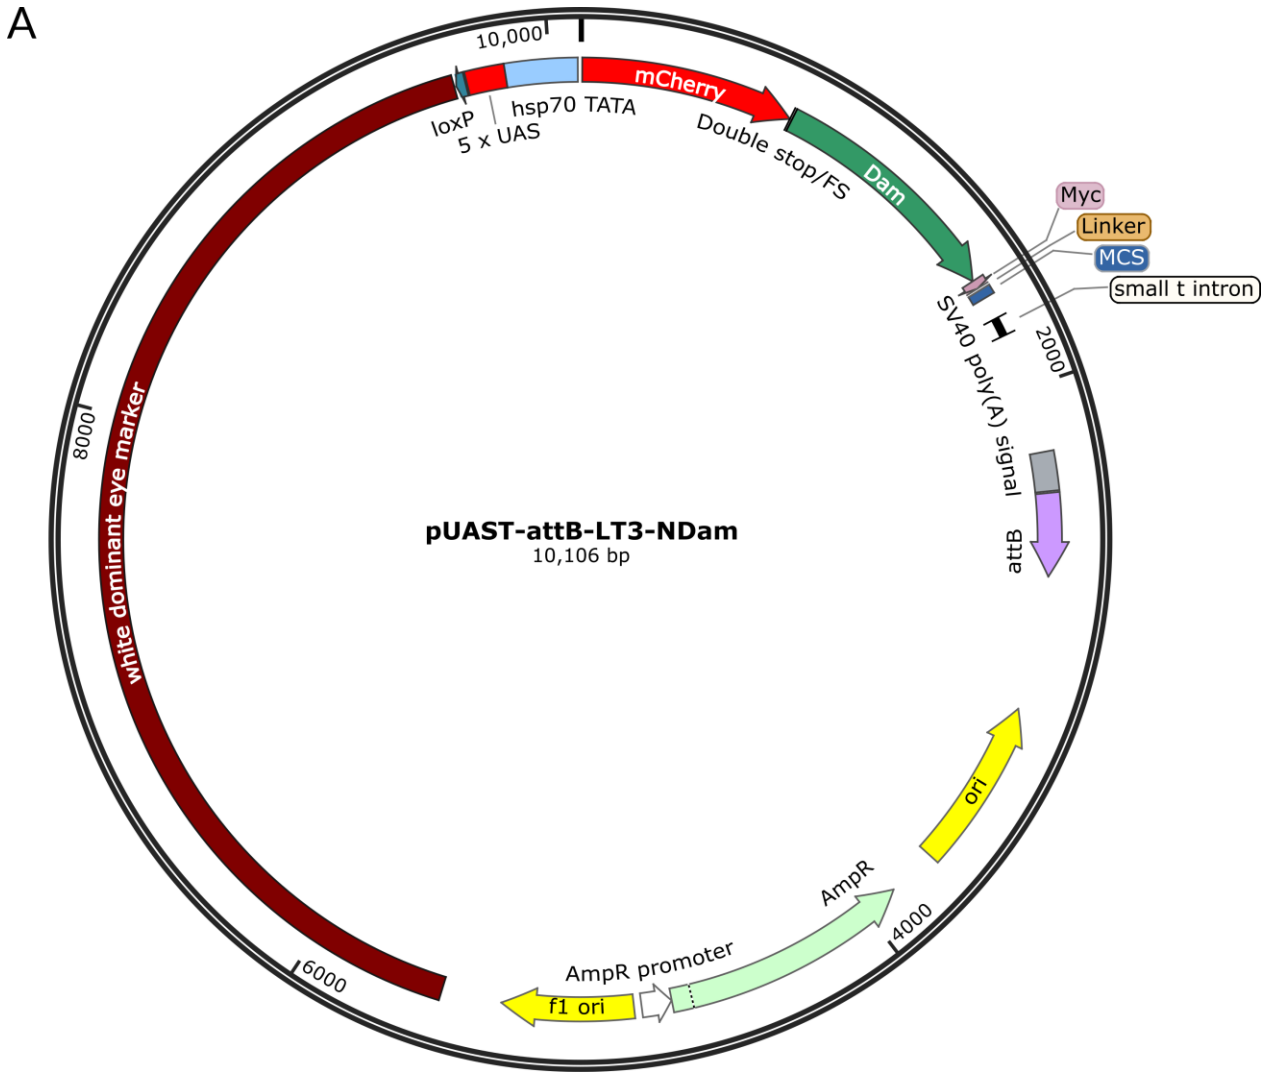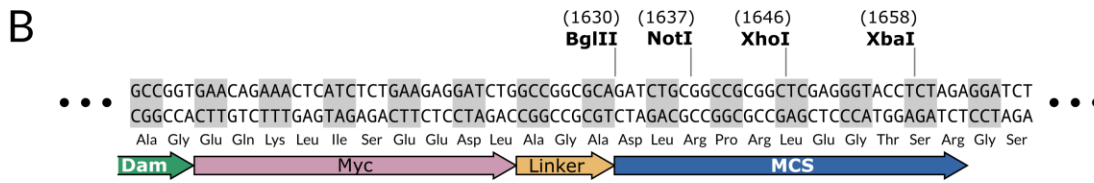

**Supplementary Figure 1**

Details of the pUAST-attB-LT3-NDam vector used for cloning Dam-fusion proteins for TaDa

(A) Schematic vector map illustrating the key features of the vector. (B) Sequence details of the linker and MCS regions of the vector; translated codons in frame with Dam are shaded. Vector map created using SnapGene software.
